# Supplementary material
Source: publisher figshare collection journal article supplement (https://karger.figshare.com/ndownloader/files/15327680)
Supplement: Supplementary file 1 [file 15327680]

**Inpatients with the clinical manifestations suspected with CAD (palpitation, chest pain, etc) (n=1207)**

**Coronary angiography**

**Inpatients diagnosed with CAD (n=489)**

**Inpatients excluded of CAD**

**(n= 307)**

**The non-CAD controls**

**(n= 231)**

**The CAD cases**

**(n=406)**

**Exclusion criteria①-④**

**Fig 1.** Enrollment process of the CAD cases and the non-CAD controls
